# Supplementary material for: Desiccation Stress Tolerance in Porphyra and Pyropia Species: A Latitudinal Analysis along the Chilean Coast
Source: MDPI journal article supplement (doi:10.3390/plants12010012), 2022-12-20
Supplement: s1 [file s1]

## Supplementary material

# Desiccation Stress Tolerance in *Porphyra* and *Pyropia* Species: A Latitudinal Analysis along the Chilean Coast

Loretto Contreras-Porcía <sup>1,2,3,4,\*</sup>, Andrés Meynard <sup>1,2,3,4</sup>, Florentina Piña <sup>1,2,3,4</sup>, Manoj Kumar <sup>5</sup>, Carlos Lovazzano <sup>6,7</sup>, Alejandra Núñez <sup>1,2,3,4</sup> and María Rosa Flores-Molina <sup>1,2,3,4</sup>

<sup>1</sup> Departamento de Ecología y Biodiversidad, Facultad de Ciencias de la Vida, Universidad Andres Bello, República 440, Santiago 8370251, Chile

<sup>2</sup> Centro de Investigación Marina Quintay (CIMARQ), Facultad de Ciencias de la Vida, Universidad Andres Bello, Quintay 2531015, Chile

<sup>3</sup> Center of Applied Ecology and Sustainability (CAPES), Santiago 8331150, Chile

<sup>4</sup> Instituto Milenio en Socio-Ecología Costera (SECOS), Santiago 8370251, Chile

<sup>5</sup> Climate Change Cluster, Faculty of Science, University of Technology Sydney, Sydney, NSW 2007, Australia

<sup>6</sup> Instituto de Bioquímica y Microbiología, Facultad de Ciencias, Universidad Austral de Chile, Valdivia 5110566, Chile

<sup>7</sup> Millennium Institute for Integrative Biology (iBio), Santiago 8331150, Chile

\* Correspondence: loretocontreras@unab.cl

**Table S1.** A) Two-way ANOVA carried out comparing the effects of species and sites on pyruvate dehydrogenase (PDH) levels exposed to desiccation and hydration treatments. *P* values lower than 0.05 indicate significant differences. Df: degrees of freedom; Sum q: Sum square; Mean Sq: Mean square; F: *f* value; Pr(>F): *P* values. B) Tukey test carried out comparing different species exposed to desiccation and hydration treatments.

## A) Two-way ANOVA:

### Desiccation

|           | Df | Sum Sq  | Mean Sq | F value | Pr (>F)   |     |
|-----------|----|---------|---------|---------|-----------|-----|
| Species   | 4  | 1255.29 | 313.823 | 11.7804 | 1.951e-05 | *** |
| Sites     | 7  | 372.72  | 53.246  | 1.9988  | 0.09747   |     |
| Residuals | 24 | 639.35  | 26.639  |         |           |     |

### Hydration

|           | Df | Sum Sq | Mean Sq | F value | Pr (>F)  |     |
|-----------|----|--------|---------|---------|----------|-----|
| Species   | 4  | 815.03 | 203.758 | 9.3714  | 0.000104 | *** |
| Sites     | 7  | 107.20 | 15.314  | 0.7043  | 0.668420 |     |
| Residuals | 24 | 521.82 | 21.743  |         |          |     |

## B) Tukey test:

### Desiccation

| Species | diff | lwr | upr | p adj |
|---------|------|-----|-----|-------|
|---------|------|-----|-----|-------|

|                             |            |            |           |           |
|-----------------------------|------------|------------|-----------|-----------|
| <i>PoFIH-PoCHF</i>          | -12667778  | -22150038  | -3.185518 | 0.0050951 |
| <i>Py.orbicularis-PoCHF</i> | 1.875556   | -5.292359  | 9.043470  | 0.9365255 |
| <i>PyCHI-PoCHF</i>          | 14.245556  | 4.763296   | 23.727815 | 0.0015315 |
| <i>PyCHJ-PoCHF</i>          | -4.989444  | -12.157359 | 2.178470  | 0.2734635 |
| <i>Py.orbicularis-PoFIH</i> | 14.543333  | 3.791461   | 25.295205 | 0.0045221 |
| <i>PyCHI-PoFIH</i>          | 26.913333  | 14.498141  | 39.328526 | 0.0000123 |
| <i>PyCHJ-PoFIH</i>          | 7.678333   | -3.073539  | 18.430205 | 0.2509769 |
| <i>PyCHI-Py.orbicularis</i> | 12.370000  | 1.618128   | 23.121872 | 0.0185978 |
| <i>PyCHJ-Py.orbicularis</i> | -6.865000  | -15.643867 | 1.913867  | 0.1782825 |
| <i>PyCHJ-PyCHI</i>          | -19.235000 | -29.986872 | -8.483128 | 0.0001879 |

#### Hydration

| Species                     | diff       | lwr         | upr       | p adj     |
|-----------------------------|------------|-------------|-----------|-----------|
| <i>PoFIH-PoCHF</i>          | -11.886111 | -20.4526574 | -3.319565 | 0.0035206 |
| <i>Py.orbicularis-PoCHF</i> | 2.715556   | -3.7601447  | 9.191256  | 0.7313290 |
| <i>PyCHI-PoCHF</i>          | 10.613889  | 2.0473426   | 19.180435 | 0.0101071 |
| <i>PyCHJ-PoCHF</i>          | -1.267778  | -7.7434781  | 5.207923  | 0.9772522 |
| <i>Py.orbicularis-PoFIH</i> | 14.601667  | 4.8881162   | 24.315217 | 0.0015216 |
| <i>PyCHI-PoFIH</i>          | 22.500000  | 11.2837581  | 33.716242 | 0.0000389 |
| <i>PyCHJ-PoFIH</i>          | 10.61833   | 0.9047829   | 20.331884 | 0.0273324 |
| <i>PyCHI-Py.orbicularis</i> | 7.898333   | -1.8152171  | 17.611884 | 0.1509302 |
| <i>PyCHJ-Py.orbicularis</i> | -3.983333  | -11.9144141 | 3.947747  | 0.5848039 |
| <i>PyCHJ-PyCHI</i>          | -11.881667 | -21.5952171 | -2.168116 | 0.0112824 |

**Table S2.** A) Two-way ANOVA carried out comparing the effects of species and sites on ascorbate peroxidase (AP), catalase (CAT), peroxiredoxin (PRX) and thioredoxin (TRX) levels exposed to desiccation and hydration treatments. *P* values lower than 0.05 indicate significant differences. Df: degrees of freedom; Sum q: Sum square; Mean Sq: Mean square; F: *f* value; Pr(>F): *P* values. B) Tukey test carried out comparing different species exposed to desiccation and hydration treatments.

#### AP

##### Desiccation

|         | Df | Sum Sq | Mean Sq | F value | Pr (>F)   |   |
|---------|----|--------|---------|---------|-----------|---|
| Species | 4  | 19849  | 4962.2  | 2.9887  | 0.0390446 | * |

|                  |    |       |        |        |           |     |
|------------------|----|-------|--------|--------|-----------|-----|
| <b>Sites</b>     | 7  | 65402 | 9343.2 | 5.6273 | 0.0006247 | *** |
| <b>Residuals</b> | 24 | 39848 | 1660.3 |        |           |     |

### Hydration

|                  | <b>Df</b> | <b>Sum Sq</b> | <b>Mean Sq</b> | <b>F value</b> | <b>Pr (&gt;F)</b> |    |
|------------------|-----------|---------------|----------------|----------------|-------------------|----|
| <b>Species</b>   | 4         | 8847.2        | 2211.8         | 3.3981         | 0.024478          | *  |
| <b>Sites</b>     | 7         | 22389.9       | 3198.6         | 4.9142         | 0.001488          | ** |
| <b>Residuals</b> | 24        | 15621.2       | 650.9          |                |                   |    |

### CAT

#### Desiccation

|                  | <b>Df</b> | <b>Sum Sq</b> | <b>Mean Sq</b> | <b>F value</b> | <b>Pr (&gt;F)</b> |     |
|------------------|-----------|---------------|----------------|----------------|-------------------|-----|
| <b>Species</b>   | 4         | 602.18        | 150.545        | 11.5392        | 2.285e-05         | *** |
| <b>Sites</b>     | 7         | 314.81        | 44.973         | 3.4472         | 0.01073           | *   |
| <b>Residuals</b> | 24        | 313.11        | 13.046         |                |                   |     |

### Hydration

|                  | <b>Df</b> | <b>Sum Sq</b> | <b>Mean Sq</b> | <b>F value</b> | <b>Pr (&gt;F)</b> |     |
|------------------|-----------|---------------|----------------|----------------|-------------------|-----|
| <b>Species</b>   | 4         | 162.118       | 40.530         | 8.2268         | 0.0002514         | *** |
| <b>Sites</b>     | 7         | 85.179        | 12.168         | 2.4700         | 0.0464446         | *   |
| <b>Residuals</b> | 24        | 118.236       | 4.927          |                |                   |     |

### PRX

#### Desiccation

|                  | <b>Df</b> | <b>Sum Sq</b> | <b>Mean Sq</b> | <b>F value</b> | <b>Pr (&gt;F)</b> |
|------------------|-----------|---------------|----------------|----------------|-------------------|
| <b>Species</b>   | 4         | 8.218         | 2.0546         | 0.4039         | 0.8039            |
| <b>Sites</b>     | 7         | 66.688        | 9.5269         | 1.8727         | 0.1191            |
| <b>Residuals</b> | 24        | 122.096       | 5.0873         |                |                   |

### Hydration

|                  | <b>Df</b> | <b>Sum Sq</b> | <b>Mean Sq</b> | <b>F value</b> | <b>Pr (&gt;F)</b> |
|------------------|-----------|---------------|----------------|----------------|-------------------|
| <b>Species</b>   | 4         | 4.685         | 1.1713         | 0.2108         | 0.9299            |
| <b>Sites</b>     | 7         | 17.089        | 2.4412         | 0.4394         | 0.8674            |
| <b>Residuals</b> | 24        | 133.326       | 5.5552         |                |                   |

### TRX

#### Desiccation

|           | Df | Sum Sq  | Mean Sq | F value | Pr (>F) |   |
|-----------|----|---------|---------|---------|---------|---|
| Species   | 4  | 4.4597  | 1.11493 | 1.2547  | 0.31498 |   |
| Sites     | 7  | 20.2011 | 2.88587 | 3.2476  | 0.01433 | * |
| Residuals | 24 | 21.3267 | 0.88861 |         |         |   |

#### Hydration

|           | Df | Sum Sq  | Mean Sq | F value | Pr (>F) |
|-----------|----|---------|---------|---------|---------|
| Species   | 4  | 4.0847  | 1.02118 | 1.2751  | 0.3073  |
| Sites     | 7  | 10.3050 | 1.47214 | 1.8383  | 0.1258  |
| Residuals | 24 | 19.2200 | 0.80083 |         |         |

#### B) Tukey test:

#### AP

#### Desiccation

| Species              | diff      | lwr         | upr        | p adj     |
|----------------------|-----------|-------------|------------|-----------|
| PoFIH-PoCHF          | -79.16667 | -154.026477 | -4.306857  | 0.0345492 |
| Py.orbicularis-PoCHF | -23.01667 | -79.605364  | 33.572031  | 0.7523027 |
| PyCHI-PoCHF          | 11.31000  | -63.549810  | 86.169810  | 0.9913402 |
| PyCHJ-PoCHF          | -27.97667 | -84.565364  | 28.612031  | 0.5989888 |
| Py.orbicularis-PoFIH | 56.15000  | -28.733046  | 141.033046 | 0.3201922 |
| PyCHI-PoFIH          | 90.47667  | -7.537832   | 188.491166 | 0.0803454 |
| PyCHJ-PoFIH          | 51.19000  | -33.693046  | 136.073046 | 0.4093889 |
| PyCHI-Py.orbicularis | 34.32667  | -50.556379  | 119.209713 | 0.7561282 |
| PyCHJ-Py.orbicularis | -4.96000  | -74.266717  | 64.346717  | 0.9995266 |
| PyCHJ-PyCHI          | -39.28667 | -124.169713 | 45.596379  | 0.6556856 |

#### Hydration

| Species              | diff       | lwr       | upr         | p adj     |
|----------------------|------------|-----------|-------------|-----------|
| PoFIH-PoCHF          | -25.398333 | -72.26905 | 21.4723840  | 0.5137661 |
| Py.orbicularis-PoCHF | 2.183333   | -33.24760 | 37.6142653  | 0.9997381 |
| PyCHI-PoCHF          | 17.461667  | -29.40905 | 64.3323840  | 0.8060563 |
| PyCHJ-PoCHF          | -34.918333 | -70.34927 | 0.5125986   | 0.0547668 |
| Py.orbicularis-PoFIH | 27.581667  | -25.56473 | 80.7280646  | 0.5546557 |
| PyCHI-PoFIH          | 42.860000  | -18.50817 | 104.2281743 | 0.2704911 |
| PyCHJ-PoFIH          | -9.520000  | -62.66640 | 43.6263979  | 0.9835987 |

|                                      |            |            |            |           |
|--------------------------------------|------------|------------|------------|-----------|
| <i>Py</i> CHI- <i>Py.orbicularis</i> | 15.278333  | -37.86806  | 68.4247313 | 0.9130408 |
| <i>Py</i> CHJ- <i>Py.orbicularis</i> | -37.101667 | -80.49552  | 6.2921855  | 0.1195949 |
| <i>Py</i> CHJ- <i>Py</i> CHI         | -52.380000 | -105.52640 | 0.7663979  | 0.0547506 |

## CAT

## Desiccation

| Species                               | diff       | lwr        | upr        | p adj     |
|---------------------------------------|------------|------------|------------|-----------|
| <i>Po</i> FIH- <i>Po</i> CHF          | -6.653333  | -13.289143 | -0.0175234 | 0.0491716 |
| <i>Py.orbicularis</i> - <i>Po</i> CHF | -5.351667  | -10.367867 | -0.3354659 | 0.0325016 |
| <i>Py</i> CHI- <i>Po</i> CHF          | 4.343333   | -2.292477  | 10.9791433 | 0.3301783 |
| <i>Py</i> CHJ- <i>Po</i> CHF          | -8.940000  | -13.956201 | -3.9237992 | 0.0001975 |
| <i>Py.orbicularis</i> - <i>Po</i> FIH | 1.301667   | -6.222635  | 8.8259679  | 0.9855908 |
| <i>Py</i> CHI- <i>Po</i> FIH          | 10.996667  | 2.308352   | 19.6849813 | 0.0083829 |
| <i>Py</i> CHJ- <i>Po</i> FIH          | -2.286667  | -9.810968  | 5.2376346  | 0.8958248 |
| <i>Py</i> CHI- <i>Py.orbicularis</i>  | 9.695000   | 2.170699   | 17.2193012 | 0.0071377 |
| <i>Py</i> CHJ- <i>Py.orbicularis</i>  | -3.588333  | -9.731900  | 2.5552329  | 0.4407847 |
| <i>Py</i> CHJ- <i>Py</i> CHI          | -13.283333 | -20.807635 | -5.7590321 | 0.0002233 |

## Hydration

| Species                               | diff       | lwr       | upr        | p adj     |
|---------------------------------------|------------|-----------|------------|-----------|
| <i>Po</i> FIH- <i>Po</i> CHF          | -2.4822222 | -6.559958 | 1.5955139  | 0.4002365 |
| <i>Py.orbicularis</i> - <i>Po</i> CHF | -3.9405556 | -7.023034 | -0.8580768 | 0.0076664 |
| <i>Py</i> CHI- <i>Po</i> CHF          | -0.3622222 | -4.439958 | 3.7155139  | 0.9988908 |
| <i>Py</i> CHJ- <i>Po</i> CHF          | -5.1855556 | -8.268034 | -2.1030768 | 0.0004105 |
| <i>Py.orbicularis</i> - <i>Po</i> FIH | -1.4583333 | -6.082051 | 3.1653848  | 0.8827424 |
| <i>Py</i> CHI- <i>Po</i> FIH          | 2.1200000  | -3.219010 | 7.4590098  | 0.7679831 |
| <i>Py</i> CHJ- <i>Po</i> FIH          | -2.7033333 | -7.327051 | 1.9203848  | 0.4397992 |
| <i>Py</i> CHI- <i>Py.orbicularis</i>  | 3.5783333  | -1.045385 | 8.2020515  | 0.1859837 |
| <i>Py</i> CHJ- <i>Py.orbicularis</i>  | -1.2450000 | -5.020250 | 2.5302500  | 0.8652242 |
| <i>Py</i> CHJ- <i>Py</i> CHI          | -4.8233333 | -9.447051 | -0.1996152 | 0.0379291 |

## PRX

## Desiccation

| Species | diff | lwr | upr | p adj |
|---------|------|-----|-----|-------|
|---------|------|-----|-----|-------|

|                             |            |           |          |           |
|-----------------------------|------------|-----------|----------|-----------|
| <i>PoFIH-PoCHF</i>          | -0.7500000 | -4.893764 | 3.393764 | 0.9829565 |
| <i>Py.orbicularis-PoCHF</i> | 0.3350000  | -2.797391 | 3.467391 | 0.9977078 |
| <i>PyCHI-PoCHF</i>          | 0.4200000  | -3.723764 | 4.563764 | 0.9981407 |
| <i>PyCHJ-PoCHF</i>          | -1.0016667 | -4.134057 | 2.130724 | 0.8775470 |
| <i>Py.orbicularis-PoFIH</i> | 1.0850000  | -3.613586 | 5.783586 | 0.9588348 |
| <i>PyCHI-PoFIH</i>          | 1.1700000  | -4.255460 | 6.595460 | 0.9677217 |
| <i>PyCHJ-PoFIH</i>          | -0.2516667 | -4.950253 | 4.446920 | 0.9998499 |
| <i>PyCHI-Py.orbicularis</i> | 0.0850000  | -4.613586 | 4.783586 | 0.9999980 |
| <i>PyCHJ-Py.orbicularis</i> | -1.3366667 | -5.173046 | 2.499713 | 0.8406764 |
| <i>PyCHJ-PyCHI</i>          | -1.4216667 | -6.120253 | 3.276920 | 0.8972846 |

### Hydration

| Species                     | diff       | lwr       | upr      | p adj     |
|-----------------------------|------------|-----------|----------|-----------|
| <i>PoFIH-PoCHF</i>          | -0.1944444 | -4.524575 | 4.135686 | 0.9999255 |
| <i>Py.orbicularis-PoCHF</i> | 0.4222222  | -2.851049 | 3.695493 | 0.9952652 |
| <i>PyCHI-PoCHF</i>          | -0.7144444 | -5.044575 | 3.615686 | 0.9879289 |
| <i>PyCHJ-PoCHF</i>          | -0.6344444 | -3.907716 | 2.638827 | 0.9780692 |
| <i>Py.orbicularis-PoFIH</i> | 0.6166667  | -4.293240 | 5.526573 | 0.9957271 |
| <i>PyCHI-PoFIH</i>          | -0.5200000 | -6.189472 | 5.149472 | 0.9987424 |
| <i>PyCHJ-PoFIH</i>          | -0.4400000 | -5.349907 | 4.469907 | 0.9988518 |
| <i>PyCHI-Py.orbicularis</i> | -1.1366667 | -6.046573 | 3.773240 | 0.9584666 |
| <i>PyCHJ-Py.orbicularis</i> | -1.0566667 | -5.065589 | 2.952255 | 0.9349305 |
| <i>PyCHJ-PyCHI</i>          | 0.0800000  | -4.829907 | 4.989907 | 0.9999987 |

### TRX

### Desiccation

| Species                     | diff       | lwr        | upr       | p adj     |
|-----------------------------|------------|------------|-----------|-----------|
| <i>PoFIH-PoCHF</i>          | 0.2444444  | -1.4873870 | 1.9762759 | 0.9933140 |
| <i>Py.orbicularis-PoCHF</i> | -0.7722222 | -2.0813637 | 0.5369193 | 0.4311017 |
| <i>PyCHI-PoCHF</i>          | 0.2111111  | -1.5207203 | 1.9429425 | 0.9961922 |
| <i>PyCHJ-PoCHF</i>          | -0.5388889 | -1.8480304 | 0.7702526 | 0.7442177 |
| <i>Py.orbicularis-PoFIH</i> | -1.0166667 | 2.9803789  | 0.9470456 | 0.5568996 |
| <i>PyCHI-PoFIH</i>          | -0.0333333 | -2.3008329 | 2.2341663 | 0.9999991 |
| <i>PyCHJ-PoFIH</i>          | -0.7833333 | -2.7470456 | 1.1803789 | 0.7650446 |

|                                       |             |            |           |           |
|---------------------------------------|-------------|------------|-----------|-----------|
| <i>Py</i> CHI- <i>Py</i> .orbicularis | 0.98333333  | -0.9803789 | 2.9470456 | 0.5874958 |
| <i>Py</i> CHJ- <i>Py</i> .orbicularis | 0.23333333  | -1.3700310 | 1.8366977 | 0.9924885 |
| <i>Py</i> CHJ- <i>Py</i> CHI          | -0.75000000 | -2.7137123 | 1.2137123 | 0.7918131 |

#### Hydration

| Species                               | diff        | lwr        | upr       | p adj     |
|---------------------------------------|-------------|------------|-----------|-----------|
| <i>Po</i> FIH- <i>Po</i> CHF          | 0.98333333  | -0.6607386 | 2.6274053 | 0.4174842 |
| <i>Py</i> .orbicularis- <i>Po</i> CHF | -0.18333333 | -1.4261349 | 1.0594682 | 0.9920906 |
| <i>Py</i> CHI- <i>Po</i> CHF          | 0.18333333  | -1.4607386 | 1.8274053 | 0.9973033 |
| <i>Py</i> CHJ- <i>Po</i> CHF          | -0.38333333 | -1.6261349 | 0.8594682 | 0.8907612 |
| <i>Py</i> .orbicularis- <i>Po</i> FIH | -1.1666667  | -3.0308690 | 0.6975357 | 0.3732190 |
| <i>Py</i> CHI- <i>Po</i> FIH          | -0.8000000  | -2.9525955 | 1.3525955 | 0.8074087 |
| <i>Py</i> CHJ- <i>Po</i> FIH          | -1.3666667  | -3.2308690 | 0.4975357 | 0.2287860 |
| <i>Py</i> CHI- <i>Py</i> .orbicularis | 0.3666667   | -1.4975357 | 2.2308690 | 0.9768621 |
| <i>Py</i> CHJ- <i>Py</i> .orbicularis | -0.2000000  | -1.7221149 | 1.3221149 | 0.9949168 |
| <i>Py</i> CHJ- <i>Py</i> CHI          | 0.5666667   | -2.4308690 | 1.2975357 | 0.8957494 |

**Table S3.** A) Two-way ANOVA carried out comparing the effects of species and sites on lipoperoxides (LPX), carbonyls (CAR) and phenolic compounds levels exposed to desiccation and hydration treatments. *P* values lower than 0.05 indicate significant differences. Df: degrees of freedom; Sum Sq: Sum square; Mean Sq: Mean square; F: *f* value; Pr(>F): *P* values. B) Tukey test carried out comparing different species exposed to desiccation and hydration treatments.

#### A) LPX

##### Desiccation

|           | Df | Sum Sq | Mean Sq | F value | Pr (>F)   |     |
|-----------|----|--------|---------|---------|-----------|-----|
| Species   | 4  | 81043  | 20260.7 | 12.6014 | 1.158e-05 | *** |
| Sites     | 7  | 59843  | 8548.9  | 5.3171  | 0.0009049 | *** |
| Residuals | 24 | 38588  | 1607.8  |         |           |     |

##### Hydration

|           | Df | Sum Sq | Mean Sq | F value | Pr (>F)   |     |
|-----------|----|--------|---------|---------|-----------|-----|
| Species   | 4  | 41031  | 10257.8 | 12.3953 | 1.317e-05 | *** |
| Sites     | 7  | 19955  | 2850.8  | 3.4448  | 0.01076   | *   |
| Residuals | 24 | 19861  | 827.6   |         |           |     |

#### CAR

**Desiccation**

|           | Df | Sum Sq | Mean Sq | F value | Pr (>F) |   |
|-----------|----|--------|---------|---------|---------|---|
| Species   | 4  | 528.55 | 132.136 | 3.6930  | 0.01763 | * |
| Sites     | 7  | 519.13 | 74.161  | 2.0727  | 0.08670 |   |
| Residuals | 24 | 858.73 | 35.780  |         |         |   |

**Hydration**

|           | Df | Sum Sq | Mean Sq | F value | Pr (>F)  |    |
|-----------|----|--------|---------|---------|----------|----|
| Species   | 4  | 417.06 | 104.264 | 4.4552  | 0.007801 | ** |
| Sites     | 7  | 33.43  | 4.775   | 0.2040  | 0.981354 |    |
| Residuals | 24 | 521.67 | 23.403  |         |          |    |

**Phenolic Compounds****Desiccation**

|           | Df | Sum Sq  | Mean Sq | F value | Pr (>F)  |    |
|-----------|----|---------|---------|---------|----------|----|
| Species   | 4  | 516835  | 129209  | 1.3363  | 0.285298 |    |
| Sites     | 7  | 2469843 | 352835  | 3.6491  | 0.008041 | ** |
| Residuals | 24 | 2320569 | 96690   |         |          |    |

**Hydration**

|           | Df | Sum Sq  | Mean Sq | F value | Pr (>F)   |     |
|-----------|----|---------|---------|---------|-----------|-----|
| Species   | 4  | 9974232 | 2493558 | 9.8863  | 7.134e-05 | *** |
| Sites     | 7  | 8962157 | 1280308 | 5.0761  | 0.001216  | **  |
| Residuals | 24 | 6053392 | 252225  |         |           |     |

**B) Tukey test:****LPX****Desiccation**

| Species                     | diff      | lwr        | upr       | p adj     |
|-----------------------------|-----------|------------|-----------|-----------|
| <i>PoFIH-PoCHF</i>          | -29.70667 | -103.37273 | 43.95939  | 0.7579847 |
| <i>Py.orbicularis-PoCHF</i> | -44.96667 | -100.65297 | 10.71964  | 0.1556072 |
| <i>PyCHI-PoCHF</i>          | 120.49667 | 46.83061   | 194.16273 | 0.0005774 |
| <i>PyCHJ-PoCHF</i>          | -67.30167 | -122.98797 | -11.61536 | 0.0124868 |
| <i>Py.orbicularis-PoFIH</i> | -15.26000 | -98.78946  | 68.26946  | 0.9823585 |
| <i>PyCHI-PoFIH</i>          | 150.20333 | 53.75182   | 246.65485 | 0.0010253 |
| <i>PyCHJ-PoFIH</i>          | -37.59500 | -121.12446 | 45.93446  | 0.6782843 |
| <i>PyCHI-Py.orbicularis</i> | 165.46333 | 81.93387   | 248.99280 | 0.0000466 |



|                                      |            |            |            |           |
|--------------------------------------|------------|------------|------------|-----------|
| <i>Py</i> CHJ- <i>Py.orbicularis</i> | -22.33500  | -90.53652  | 45.86652   | 0.8681043 |
| <i>Py</i> CHJ- <i>Py</i> CHI         | -187.78933 | -271.32780 | -104.26887 | 0.0000070 |

#### Hydration

| Species                              | diff       | lwr        | upr        | p adj     |
|--------------------------------------|------------|------------|------------|-----------|
| <i>Po</i> FIH- <i>Po</i> CHF         | -961.1539  | -1883.8178 | -38.48998  | 0.0382883 |
| <i>Py.orbicularis-Po</i> CHF         | -457.4206  | -1154.8889 | 240.04780  | 0.3283009 |
| <i>Py</i> CHI- <i>Po</i> CHF         | 1127.9528  | 205.2889   | 2050.61669 | 0.0113382 |
| <i>Py</i> CHJ- <i>Po</i> CHF         | -752.8039  | -1450.2722 | -55.33553  | 0.0299457 |
| <i>Py.orbicularis-Po</i> FIH         | 503.7333   | -542.4692  | 1549.93587 | 0.6222500 |
| <i>Py</i> CHI- <i>Po</i> FIH         | 2089.1067  | 881.0560   | 3297.15730 | 0.0002908 |
| <i>Py</i> CHJ- <i>Po</i> FIH         | 208.3500   | -837.8525  | 1254.55253 | 0.9757893 |
| <i>Py</i> CHI- <i>Py.orbicularis</i> | 1585.3733  | 539.1708   | 2631.57587 | 0.0013928 |
| <i>Py</i> CHJ- <i>Py.orbicularis</i> | -295.3833  | -1149.6041 | 558.83746  | 0.8442556 |
| <i>Py</i> CHJ- <i>Py</i> CHI         | -1880.7567 | -2926.9592 | -834.55413 | 0.0001764 |

#### CAR

#### Desiccation

| Species                              | diff         | lwr        | upr       | p adj     |
|--------------------------------------|--------------|------------|-----------|-----------|
| <i>Po</i> FIH- <i>Po</i> CHF         | 1.1488889    | -9.840453  | 12.138231 | 0.9979019 |
| <i>Py.orbicularis-Po</i> CHF         | -0.77111111  | -9.078273  | 7.536051  | 0.9986819 |
| <i>Py</i> CHI- <i>Po</i> CHF         | 13.74222222  | 2.752880   | 24.731565 | 0.0093253 |
| <i>Py</i> CHJ- <i>Po</i> CHF         | 0.07555556   | -8.231606  | 8.382718  | 0.9999999 |
| <i>Py.orbicularis-Po</i> FIH         | -1.92000000  | -14.380743 | 10.540743 | 0.9906707 |
| <i>Py</i> CHI- <i>Po</i> FIH         | 12.59333333  | -1.795093  | 26.981760 | 0.1065121 |
| <i>Py</i> CHJ- <i>Po</i> FIH         | -1.07333333  | -13.534076 | 11.387410 | 0.9990171 |
| <i>Py</i> CHI- <i>Py.orbicularis</i> | 14.51333333  | 2.052590   | 26.974076 | 0.0168811 |
| <i>Py</i> CHJ- <i>Py.orbicularis</i> | 0.84666667   | -9.327487  | 11.020821 | 0.9991418 |
| <i>Py</i> CHJ- <i>Py</i> CHI         | -13.66666667 | -26.127410 | -1.205924 | 0.0266813 |

#### Hydration

| Species                      | diff      | lwr         | upr       | p adj     |
|------------------------------|-----------|-------------|-----------|-----------|
| <i>Po</i> FIH- <i>Po</i> CHF | -4.508333 | -13.3959341 | 4.3792674 | 0.5757502 |

|                             |           |             |             |           |
|-----------------------------|-----------|-------------|-------------|-----------|
| <i>Py.orbicularis-PoCHF</i> | -6.603333 | -13.3217280 | 0.1150613   | 0.0556861 |
| <i>PyCHI-PoCHF</i>          | 6.603333  | -2.6792674  | 15.09593421 | 0.2703243 |
| <i>PyCHJ-PoCHF</i>          | -3.076667 | -9.7950613  | 3.6417280   | 0.6643755 |
| <i>Py.orbicularis-PoFIH</i> | -2.095000 | -12.1725920 | 7.9825920   | 0.9717096 |
| <i>PyCHI-PoFIH</i>          | 10.716667 | -0.9199342  | 22.3532676  | 0.0813883 |
| <i>PyCHJ-PoFIH</i>          | 1.431667  | -8.6459253  | 11.5092587  | 0.9931469 |
| <i>PyCHI-Py.orbicularis</i> | 12.811667 | 2.7340747   | 22.8892587  | 0.0080580 |
| <i>PyCHJ-Py.orbicularis</i> | 3.526667  | -4.7016527  | 11.7549861  | 0.7156128 |
| <i>PyCHJ-PyCHI</i>          | -9.285000 | -19.3625920 | 0.7925920   | 0.0811903 |

## Phenolic Compounds

### Desiccation

| Species                     | diff        | lwr        | upr       | p adj     |
|-----------------------------|-------------|------------|-----------|-----------|
| <i>PoFIH-PoCHF</i>          | 120.071111  | -451.1989  | 691.3411  | 0.9705664 |
| <i>Py.orbicularis-PoCHF</i> | 96.526111   | -335.3134  | 528.3656  | 0.9633156 |
| <i>PyCHI-PoCHF</i>          | 433.567778  | -137.7022  | 1004.8378 | 0.2009027 |
| <i>PyCHJ-PoCHF</i>          | 9.859444    | -421.9801  | 441.6990  | 0.9999950 |
| <i>Py.orbicularis-PoFIH</i> | -23.545000  | -671.3043  | 624.2143  | 0.9999679 |
| <i>PyCHI-PoFIH</i>          | 313.496667  | -434.4713  | 1061.4646 | 0.7316899 |
| <i>PyCHJ-PoFIH</i>          | -110.211667 | -757.9709  | 537.5476  | 0.9864574 |
| <i>PyCHI-Py.orbicularis</i> | 337.041667  | -310.7176  | 984.8009  | 0.5522411 |
| <i>PyCHJ-Py.orbicularis</i> | -86.666667  | -615.5599  | 442.2266  | 0.9882360 |
| <i>PyCHJ-PyCHI</i>          | -423.708333 | -1071.4676 | 224.0509  | 0.3307797 |

### Hydration

| Species                     | diff      | lwr        | upr        | p adj     |
|-----------------------------|-----------|------------|------------|-----------|
| <i>PoFIH-PoCHF</i>          | -961.1539 | -1883.8178 | -38.48998  | 0.0382883 |
| <i>Py.orbicularis-PoCHF</i> | -457.4206 | -1154.8889 | 240.04780  | 0.3283009 |
| <i>PyCHI-PoCHF</i>          | 1127.9528 | 205.2889   | 2050.61669 | 0.0113382 |
| <i>PyCHJ-PoCHF</i>          | -752.8039 | -1450.2722 | -55.33553  | 0.0299457 |
| <i>Py.orbicularis-PoFIH</i> | 503.7333  | -542.4692  | 1549.93587 | 0.6222500 |
| <i>PyCHI-PoFIH</i>          | 2089.1067 | 881.0560   | 3297.15730 | 0.0002908 |
| <i>PyCHJ-PoFIH</i>          | 208.3500  | -837.8525  | 1254.55253 | 0.9757893 |

---

|                             |            |            |            |           |
|-----------------------------|------------|------------|------------|-----------|
| <i>PyCHI-Py.orbicularis</i> | 1585.3733  | 539.1708   | 2631.57587 | 0.0013928 |
| <i>PyCHJ-Py.orbicularis</i> | -295.3833  | -1149.6041 | 558.83746  | 0.8442556 |
| <i>PyCHJ-PyCHI</i>          | -1880.7567 | -2926.9592 | -834.55413 | 0.001764  |

---

**Table S4.** Two-way ANOVA carried out comparing the effects of treatments (hydration, desiccation, and rehydration) and sites on gene expression *in vitro* of catalase (*cat*), peroxiredoxin (*prx*) and thioredoxin (*trx*) levels for *Porphyra* and *Pyropia* species. *P* values lower than 0.05 indicate significant differences. Df: degrees of freedom; Sum q: Sum square; Mean Sq: Mean square; F: *f* value; Pr(>F): *P* values.

*cat*

|                   | Df | Sum Sq | Mean Sq | F value | Pr (>F)   |     |
|-------------------|----|--------|---------|---------|-----------|-----|
| <b>Treatments</b> | 2  | 7.2048 | 3.6024  | 70.4434 | 9.043e-11 | *** |
| <b>Sites</b>      | 3  | 0.5870 | 0.1957  | 3.8259  | 0.02263   | *   |
| <b>Tre:Sit</b>    | 6  | 1.8837 | 0.3140  | 6.1393  | 0.0005    | *** |
| <b>Residuals</b>  | 24 | 1.2273 | 0.0511  |         |           |     |

*prx*

|                   | Df | Sum Sq | Mean Sq | F value | Pr (>F)   |     |
|-------------------|----|--------|---------|---------|-----------|-----|
| <b>Treatments</b> | 2  | 5.9755 | 2.98775 | 49.0307 | 3.339e-09 | *** |
| <b>Sites</b>      | 3  | 0.7583 | 0.25276 | 4.1480  | 0.01675   | *   |
| <b>Tre:Sit</b>    | 6  | 1.9439 | 0.32398 | 5.3167  | 0.00130   | **  |
| <b>Residuals</b>  | 24 | 1.4625 | 0.06094 |         |           |     |

*trx*

|                   | Df | Sum Sq  | Mean Sq | F value | Pr (>F)   |     |
|-------------------|----|---------|---------|---------|-----------|-----|
| <b>Treatments</b> | 2  | 2.1233  | 1.06167 | 24.2839 | 1.712e-06 | *** |
| <b>Sites</b>      | 3  | 0.86984 | 0.28995 | 6.6321  | 0.00202   | **  |
| <b>Tre:Sit</b>    | 6  | 1.04181 | 0.17363 | 3.9716  | 0.00671   | **  |
| <b>Residuals</b>  | 24 | 1.04926 | 0.04372 |         |           |     |

**Table S5.** Primers sequences used for real-time PCR experiments. Source: [25, 29].

| Gene                          | Abbreviation | Primers sequences                                |
|-------------------------------|--------------|--------------------------------------------------|
| Catalase                      | <i>cat</i>   | F CGCAGGGATGCCGTAATCAG<br>R CCAGCGACACTTTGTTGACG |
| Peroxiredoxin                 | <i>prx</i>   | F CTGCCATGCTATGTGACTTTG<br>R CGGCTGCATAATTCGTGAA |
| Thioredoxin                   | <i>trx</i>   | F CGAATAGGGCAGAGTGTATGA<br>R ACTGTCGCTGATGTGTTTG |
| Senescence-associated protein | <i>sen</i>   | F TCGCAATGATAGGAAGAGC<br>R TTTACCAGAGGTGTCGGA    |
